# Supplementary material for: Associations between cognitive impairment and cerebrovascular reserve in different lobes during the acute stroke of anterior circulations
Source: Research Square preprint supplement (doi:10.21203/rs.3.rs-1139963/v1), 2022-01-28
Supplement: Supplementary file 1 [file 35c5ffc4267eeca857e86f68.docx]

**Table 3 The cerebrovascular reserve in study participants**

| **Variables Controls Left infarction Right infarction P**  Mean (SD) **(N = 29) (N = 38) (N = 58)** |
| --- |
| **Frontal lobe** |
| CBF, right 55.84 (5.97) 53.66 (7.55) 53.98 (9.07) 0.504 |
| CBF, left 57.23 (6.23) 53.63 (6.65) 55.18 (7.33) 0.116 |
| CBV, right 3.26 (0.29) 3.38 (0.49) 3.48 (0.74) 0.243 |
| CBV, left 3.28 (0.30) 3.45 (0.51) 3.52 (0.90) 0.332 |
| MTT, right 4.01 (0.76) 4.50 (0.78) 4.59 (0.96) 0.013  p = 0.043 p = 0.007 |
| MTT, left 3.86 (0.63) 4.64 (0.96) 4.46 (0.92) 0.002  p = 0.001 p = 0.008 |
| TTP, right 10.51 (2.03) 10.43 (1.01) 10.54 (1.42) 0.945 |
| TTP, left 10.67 (1.03) 10.61 (1.34) 10.07 (1.38) 0.056 |
| **Temporal lobe** |
| CBF, right 65.91 (8.71) 65.87 (9.91) 67.92 (11.84) 0.572 |
| CBF, left 66.75 (11.64) 58.81 (13.63) 67.70 (13.42) 0.004  p = 0.030 p = 0.924 |
| CBV, right 3.92 (0.44) 4.11 (0.59) 4.34 (0.69) 0.012  p = 0.351 p = 0.007 |
| CBV, left 3.86 (0.54) 4.03 (0.77) 4.23 (1.10) 0.189 |
| MTT, right 4.16 (0.87) 4.40 (0.69) 4.50 (1.15) 0.304 |
| MTT, left 3.97 (1.10) 5.01 (1.58) 4.31 (0.94) 0.002  p = 0.001 p = 0.345 |
| TTP, right 10.98 (1.17) 10.35 (0.99) 10.62 (1.90) 0.258 |
| TTP, left 10.78 (1.09) 11.32 (2.27) 10.18 (1.94) 0.017  p = 0.400 p = 0.273 |
| **Parietal lobe** |
| CBF, right 57.10 (8.28) 54.22 (8.81) 51.32 (11.15) 0.038  p = 0.383 p = 0.022 |
| CBF, left 58.50 (8.57) 51.40 (11.06) 52.63 (10.98) 0.019  p = 0.014 p = 0.030 |
| CBV, right 3.39 (0.34) 3.43 (0.55) 3.44 (0.77) 0.929 |
| CBV, left 3.47 (0.36) 3.52 (0.62) 5.30 (10.46) 0.384 |
| MTT, right 4.21 (0.74) 4.54 (0.58) 4.94 (1.21) 0.004  p = 0.290 p = 0.003 |
| MTT, left 4.24 (0.75) 5.09 (1.32) 4.68 (1.02) 0.007  p = 0.003 p = 0.128 |
| TTP, right 11.31 (1.06) 10.81 (1.00) 11.26 (1.56) 0.183 |
| TTP, left 11.22 (1.08) 11.39 (1.91) 10.66 (1.44) 0.057 |
| **Occipital lobe** |
| CBF, right 59.24 (6.81) 59.88 (11.95) 59.03 (10.05) 0.920 |
| CBF, left 56.05 (8.58) 52.93 (14.31) 57.25 (9.52) 0.174 |
| CBV, right 3.42 (0.41) 3.75 (0.74) 3.80 (0.70) 0.044  p = 0.088 p = 0.027 |
| CBV, left 3.28 (0.46) 4.84 (7.53) 3.67 (0.72) 0.264 |
| MTT, right 3.98 (0.66) 4.47 (0.77) 4.56 (1.19) 0.032  p = 0.074 p = 0.019 |
| MTT, left 4.07 (0.78) 5.15 (1.73) 4.49 (0.89) 0.001  p = 0.001 p = 0.209 |
| TTP, right 11.48 (1.10) 10.89 (1.02) 11.12 (2.04) 0.330 |
| TTP, left 11.32 (1.02) 11.50 (2.12) 10.71 (1.75) 0.074 |
| **Semioval center** |
| CBF, right 47.99 (5.59) 46.40 (7.12) 44.73 (8.14) 0.146 |
| CBF, left 48.68 (5.10) 42.92 (8.46) 44.82 (7.88) 0.010  p = 0.005 p = 0.050 |
| CBV, right 2.91 (0.30) 3.00 (0.44) 3.04 (0.52) 0.434 |
| CBV, left 2.93 (0.29) 2.96 (0.40) 2.99 (0.82) 0.900 |
| MTT, right 4.27 (0.69) 4.68 (0.68) 5.02 (1.16) 0.003  p = 0.139 p = 0.001 |
| MTT, left 4.24 (0.68) 5.17 (1.33) 4.86 (1.16) 0.005  p = 0.003 p = 0.033 |
| TTP, right 11.39 (1.09) 10.82 (1.07) 11.34 (1.60) 0.125 |
| TTP, left 11.21 (1.06) 11.26 (1.62) 10.77 (1.42) 0.183 |
| **Basal ganglia** |
| CBF, right 66.12 (8.13) 63.25 (8.03) 62.72 (9.09) 0.216 |
| CBF, left 67.95 (8.67) 60.90 (13.90) 63.97 (11.64) 0.061  p = 0.033 p = 0.239 |
| CBV, right 3.76 (0.27) 3.82 (0.46) 3.92 (0.45) 0.222 |
| CBV, left 3.82 (0.31) 3.95 (0.69) 3.90 (0.41) 0.577 |
| MTT, right 3.75 (0.63) 4.04 (0.59) 4.31 (0.73) 0.002  p = 0.152 p = 0.001 |
| MTT, left 3.69 (0.52) 4.53 (1.27) 3.97 (0.60) 0.000  p = 0.000 p = 0.257 |
| TTP, right 10.41 (1.04) 9.84 (1.26) 9.90 (1.48) 0.180 |
| TTP, left 10.11 (1.02) 10.09 (1.45) 9.32 (1.33) 0.005  p = 0.998 p = 0.018 |
