# Supplementary material for: Associations between cognitive impairment and cerebrovascular reserve in different lobes during the acute stroke of anterior circulations
Source: Research Square preprint supplement (doi:10.21203/rs.3.rs-1139963/v1), 2022-01-28
Supplement: Supplementary file 2 [file fb5d89b2dcb8b967b5e8a767.docx]

**Table 4 The linear regression analysis for cognitive impairment against cerebrovascular reserve**

| **B S.E. P** |
| --- |
| **Left infarction** |
| Constant 27.746 8.382 0.002 |
| CBF, right, frontal lobe -0.600 0.153 0.000 |
| CBV, left, frontal lobe 5.046 2.121 0.023 |
| CBF, left, parietal lobe 0.255 0.089 0.007 |
| MTT, left, occipital lobe -1.215 0.554 0.035 |
| **Right infarction** |
| Constant 22.750 6.082 0.000 |
| CBF, left, temporal lobe -0.300 0.104 0.006 |
| CBF, right, temporal lobe 0.202 0.091 0.030 |
